# Supplementary material
Source: PubMed Central journal article supplement (PMC2840106)
Supplement: 0914612107_pnas.0914612107_SI.pdf [file 0914612107_pnas.0914612107_SI.pdf]

# Supporting Information

Vukojević et al. 10.1073/pnas.0914612107

## SI Text

**Supplement 1: Determination of DNA – Scr-HD Binding Constants in the Polytene Nucleus. Nonspecific interactions.** Nonspecific interactions between DNA and Scr-HD<sub>DD</sub> can be described as a reversible reaction:

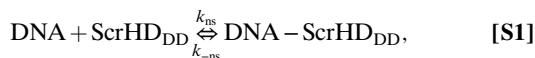

where  $k_{\text{ns}}$  and  $k_{-\text{ns}}$  are rate constants for the formation and dissociation of the nonspecific complex between Scr-HD<sub>DD</sub> and DNA, respectively. At equilibrium the forward and backward reactions are equal:

$$k_{\text{ns}} \cdot [\text{DNA}] \cdot [\text{ScrHD}_{\text{DD}}] = k_{-\text{ns}} \cdot [\text{DNA} - \text{ScrHD}_{\text{DD}}] \quad [\text{S2}]$$

and the concentration of nonspecifically bound Scr-HD<sub>DD</sub> is:

$$[\text{DNA} - \text{ScrHD}_{\text{DD}}] = \frac{k_{\text{ns}}}{k_{-\text{ns}}} \cdot [\text{DNA}] \cdot [\text{ScrHD}_{\text{DD}}]. \quad [\text{S3}]$$

The total concentration of the bound and unbound reactive species is constant and equal to the respective initial concentrations. Therefore, concentrations of the reactive species at any time are:

$$[\text{ScrHD}_{\text{DD}}] = [\text{ScrHD}_{\text{DD}}]_0 - [\text{DNA} - \text{ScrHD}_{\text{DD}}] \quad [\text{S4}]$$

$$[\text{DNA}] = [\text{DNA}]_0 - [\text{DNA} - \text{ScrHD}_{\text{DD}}] \quad [\text{S5}]$$

The total concentration of potential binding sites in a polytene nuclei is noticeably higher than the total concentration of the transcription factor under physiologically relevant conditions. Changes in the DNA concentration due to Scr-HD<sub>DD</sub> binding can be therefore neglected and the DNA concentration can be regarded as constant and equal to the total DNA concentration:

$$[\text{DNA}] \approx [\text{DNA}]_0. \quad [\text{S6}]$$

Introducing relations **S4** and **S5** in Eq. **S6** gives:

$$[\text{DNA} - \text{ScrHD}_{\text{DD}}] = \frac{k_{\text{ns}}}{k_{-\text{ns}}} \cdot [\text{DNA}]_0 \cdot ([\text{ScrHD}_{\text{DD}}]_0 - [\text{DNA} - \text{ScrHD}_{\text{DD}}]) \quad [\text{S7}]$$

$$\left(1 + \frac{k_{\text{ns}}}{k_{-\text{ns}}} \cdot [\text{DNA}]_0\right) [\text{DNA} - \text{ScrHD}_{\text{DD}}] = \frac{k_{\text{ns}}}{k_{-\text{ns}}} \cdot [\text{DNA}]_0 \cdot [\text{ScrHD}_{\text{DD}}]_0 \quad [\text{S8}]$$

$$[\text{DNA} - \text{ScrHD}_{\text{DD}}] = \frac{\frac{k_{\text{ns}}}{k_{-\text{ns}}}}{\left(1 + \frac{k_{\text{ns}}}{k_{-\text{ns}}} \cdot [\text{DNA}]_0\right)} \cdot [\text{DNA}]_0 \cdot [\text{ScrHD}_{\text{DD}}]_0 \quad [\text{S9}]$$

$$[\text{DNA} - \text{ScrHD}_{\text{DD}}] = \frac{k_{\text{ns}}}{(k_{-\text{ns}} + k_{\text{ns}} \cdot [\text{DNA}]_0)} \cdot [\text{DNA}]_0 \cdot [\text{ScrHD}_{\text{DD}}]_0 \quad [\text{S10}]$$

As expected, concentration of the nonspecific complex [DNA-Scr-HD<sub>DD</sub>] increases linearly with the concentration of the transcription factor.

Using the data from FCS measurements (Fig. 5, *Black Line*), we estimate the dissociation constant for the nonspecific DNA – Scr-HD DD complex to be:

$$\frac{k_{\text{ns}} \cdot [\text{DNA}]_0}{(k_{-\text{ns}} + k_{\text{ns}} \cdot [\text{DNA}]_0)} = (0.35 \pm 0.15) \quad [\text{S11}]$$

$$k_{\text{ns}} \cdot [\text{DNA}]_0 = 0.35 \cdot (k_{-\text{ns}} + k_{\text{ns}} \cdot [\text{DNA}]_0) \quad [\text{S12}]$$

$$(1 - 0.3)k_{\text{ns}} \cdot [\text{DNA}]_0 = 0.35 \cdot k_{-\text{ns}} \quad [\text{S13}]$$

$$k_{\text{ns}} \cdot [\text{DNA}]_0 = \frac{0.35}{(1 - 0.35)} \cdot k_{-\text{ns}} \quad [\text{S14}]$$

$$k_{\text{ns}} \cdot [\text{DNA}]_0 = 0.54 \cdot k_{-\text{ns}} \quad [\text{S15}]$$

$$\frac{k_{-\text{ns}}}{k_{\text{ns}}} = K_d^{\text{ScrHD}_{\text{DD}},\text{ns}} = \frac{[\text{DNA}]_0}{0.54} \quad [\text{S16}]$$

**Nonspecific and Specific Interactions.** The transcriptionally active variants of Scr-HD<sub>wt</sub> and Scr-HD<sub>AA</sub>, undergo both specific and nonspecific interactions with DNA. Assuming that nonspecific interactions precede the specific ones, a two-step process of consecutive reactions was anticipated:

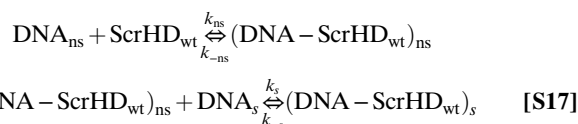

The turnover rate for the nonspecific complex is:

$$\frac{d[(\text{DNA} - \text{ScrHD}_{\text{wt}})_{\text{ns}}]}{dt} = k_{\text{ns}} \cdot [\text{DNA}_{\text{ns}}] \cdot [\text{ScrHD}_{\text{wt}}] - (k_{-\text{ns}} + k_{\text{s}} \cdot [\text{DNA}_{\text{s}}]) \cdot [(\text{DNA} - \text{ScrHD}_{\text{wt}})_{\text{ns}}] + k_{-\text{s}} \cdot [(\text{DNA} - \text{ScrHD}_{\text{wt}})_{\text{s}}] \quad [\text{S18}]$$

Assuming a quasi-steady state approximation:

$$\frac{d[(\text{DNA} - \text{ScrHD}_{\text{wt}})_{\text{ns}}]}{dt} = 0 \quad [\text{S19}]$$

$$(k_{-\text{ns}} + k_{\text{s}} \cdot [\text{DNA}_{\text{s}}]) \cdot [(\text{DNA} - \text{ScrHD}_{\text{wt}})_{\text{ns}}] = k_{\text{ns}} \cdot [\text{DNA}_{\text{ns}}] \cdot [\text{ScrHD}_{\text{wt}}] + k_{-\text{s}} \cdot [(\text{DNA} - \text{ScrHD}_{\text{wt}})_{\text{s}}]. \quad [\text{S20}]$$

Using the mass balance equation to express the concentration of the free transcription factor:

$$[\text{ScrHD}_{\text{wt}}] = [\text{ScrHD}_{\text{wt}}]_0 - [(\text{DNA} - \text{ScrHD}_{\text{wt}})_{\text{ns}}] - [(\text{DNA} - \text{ScrHD}_{\text{wt}})_{\text{s}}] \quad [\text{S21}]$$

and assuming as previously that:

$$[\text{DNA}]_{\text{ns}} \approx [\text{DNA}]_0, \quad [\text{S22}]$$

Eq. S23 becomes:

$$\begin{aligned} & (k_{-ns} + k_s \cdot [DNA_s]) \cdot [(DNA - ScrHD_{wt})_{ns}] \\ & = k_{ns} \cdot [DNA]_0 \cdot ([ScrHD_{wt}]_0 - [(DNA - ScrHD_{wt})_{ns}] \\ & \quad - [(DNA - ScrHD_{wt})_s]) + k_{-s} \cdot [(DNA - ScrHD_{wt})_s] \end{aligned} \quad [S23]$$

$$\begin{aligned} & (k_{-ns} + k_s \cdot [DNA_s] + k_{ns} \cdot [DNA]_0) \cdot [(DNA - ScrHD_{wt})_{ns}] \\ & = k_{ns} \cdot [DNA]_0 \cdot ([ScrHD_{wt}]_0 - [(DNA - ScrHD_{wt})_s]) \\ & \quad + k_{-s} \cdot [(DNA - ScrHD_{wt})_s] \end{aligned} \quad [S24]$$

$$\begin{aligned} & (k_{-ns} + k_s \cdot [DNA_s] + k_{ns} \cdot [DNA]_0) \cdot [(DNA - ScrHD_{wt})_{ns}] \\ & = k_{ns} \cdot [DNA]_0 \cdot [ScrHD_{wt}]_0 \\ & \quad - (k_{ns} \cdot [DNA] - k_{-s}) \cdot [(DNA - ScrHD_{wt})_s] \end{aligned} \quad [S25]$$

$$\begin{aligned} [(DNA - ScrHD_{wt})_{ns}] &= \frac{k_{ns} \cdot [DNA]_0}{k_{-ns} + k_s \cdot [DNA_s] + k_{ns} \cdot [DNA]_0} \\ & \quad \cdot [ScrHD_{wt}]_0 \\ & \quad - \frac{k_{ns} \cdot [DNA]_0 - k_{-s}}{k_{-ns} + k_s \cdot [DNA_s] + k_{ns} \cdot [DNA]_0} \\ & \quad \cdot [(DNA - ScrHD_{wt})_s]. \end{aligned} \quad [S26]$$

According to Eq. S26 and the FCS data presented in Fig. 5 (Red Stars), the slope of the linear dependence gives:

$$\frac{k_{ns} \cdot [DNA]_0}{k_{-ns} + k_s \cdot [DNA_s] + k_{ns} \cdot [DNA]_0} = (0.60 \pm 0.05) \quad [S27]$$

and the intercept:

$$\begin{aligned} & \frac{k_{ns} \cdot [DNA]_0 - k_{-s}}{k_{-ns} + k_s \cdot [DNA_s] + k_{ns} \cdot [DNA]_0} \cdot [(DNA - ScrHD_{wt})_s] \\ & = (50 \pm 30) \text{ nM}. \end{aligned} \quad [S28]$$

If  $k_{-s}$  is small compared to  $k_{ns} \cdot [DNA]_0$  and can therefore be neglected, then:

$$0.6 \cdot [(DNA - ScrHD_{wt})_s] = 50 \text{ nM}. \quad [S29]$$

Thus, the concentration of specific complex between *Scr*-HD wild type and DNA in the polytene nucleus can be estimated to be:

$$[(DNA - ScrHD_{wt})_s] = (80 \pm 50) \text{ nM}. \quad [S30]$$

FCS data enabled us also to estimate the dissociation constant for the nonspecific DNA – *Scr*-HD wt complex (Fig. 5, Dotted Red Line):

$$\frac{k_{ns} \cdot [DNA]_0}{(k_{-ns} + k_{ns} \cdot [DNA]_0)} = (0.65 \pm 0.05) \quad [S31]$$

$$\frac{k_{-ns}}{k_{ns}} = K_d^{ScrHD_{wt,ns}} = \frac{[DNA]_0}{1.9}. \quad [S32]$$

**Supplement 2: Calculation of the Concentration of DNA Sites for Specific and Nonspecific Binding of the *Scr*-HD Within a Polytene Nucleus.** The *Drosophila* haploid genome size is  $1.76 \times 10^8$  bp long; this means that the diploid genome size is  $2 \times 1.76 \times 10^8 = 3.52 \times 10^8$  bp long.

Polytene cells normally undergo 10 DNA-replication cycles without cell division, thus  $2^{10} = 1024$  chromosomal copies are produced.

This results in  $1024 \times 3.52 \times 10^8 = 3.6 \times 10^{11}$  bp within a polytene nucleus.

However, a protein molecule can interact (bind specifically or nonspecifically) only with a few base-pairs of the DNA.

A) For nonspecific binding (i.e., binding to DNA sequences that do not belong to the putative *cis*-regulatory elements bound by *Scr*) we assume on the average a 6 bp DNA interaction domain with the consensus sequence TAATCG or TAATGG found for *Scr*, *Unx*, and *Antp* (1–4). Taking into consideration that this consensus occurs every 2048 bp in the genome, this results in  $\frac{3.6 \times 10^{11}}{2048} = 1.758 \times 10^8$  sites within a polytene nucleus. 1 mol of potential sites contains  $6.023 \times 10^{23}$  sites.

$n$  mol of potential sites contain  $1.758 \times 10^8$  sites, thus  $n = \frac{1.758 \times 10^8}{6.023 \times 10^{23}} = 0.292 \times 10^{-15}$  mol of nonspecific sites within the polytene nucleus.

However, the *Drosophila* euchromatin comprises 117 Mbp (5), which means that only 66.5% of the total DNA length can be considered as candidate sequences for transcription factor–DNA interactions. This results in  $0.292 \times 10^{-15} \times 0.665 = 0.194 \times 10^{-15}$  mol of binding sites.

Experimentally we have determined the diameter of a polytene nucleus as 20  $\mu\text{m}$ , thus the radius is 10  $\mu\text{m}$ . The volume of the nucleus will be

$$\begin{aligned} V_{\text{nucleus}} &= \frac{4}{3} \pi r^3 = \frac{4}{3} \times 3.14 \times (10 \times 10^{-6})^3 \text{ m}^3 = 4.187 \times 10^{-15} \text{ m}^3 \\ &= 4.187 \times 10^{-15} \times 10^3 \text{ (dm)}^3 = 4.187 \times 10^{-12} \text{ L}. \end{aligned} \quad [S33]$$

The concentration of the potential DNA-transcription factor binding sites will be thus

$$C_{\text{sites}}^{\text{non-specific}} = \frac{n}{V_{\text{nucleus}}} = \frac{1.94 \times 10^{-16}}{4.187 \times 10^{-12}} = 46 \mu\text{M}. \quad [S34]$$

B) For specific binding to occur, usually a larger sequence is necessary. One example are the *fkh250* and *fkh250<sup>on</sup>* elements, which consist of 10 bp (AGATTAATCG) and can bind either an *Scr*-Exd or a *Ubx*-Exd complex, respectively (6). Assuming thus a minimum requirement of 10 bp to confer *Scr* binding specificity, this sequence may occur once every  $4^{10} = 1048576 \cong 1.048 \times 10^6$  bp in the genome.

This results in  $\frac{3.65 \times 10^{11}}{1.048 \times 10^6} = 3.48 \times 10^5$  sites within a polytene nucleus.

1 mol of potential sites contains  $6.023 \times 10^{23}$  sites.  $n$  mol of potential sites contain  $3.48 \times 10^5$  sites thus  $n = \frac{3.48 \times 10^5}{6.023 \times 10^{23}} = 0.578 \times 10^{-18}$  mol.

Thus the concentration of specific binding sites within the polytene nucleus will be

$$C_{\text{sites}}^{\text{specific}} = \frac{n}{V_{\text{nucleus}}} = \frac{0.578 \times 10^{-18} \times 0.665}{4.187 \times 10^{-12}} = 92 \text{ nM}. \quad [S35]$$

**Supplement 3: Isoelectric Points of *Scr*-HD Variants.** Isoelectric points for *Scr*-HD variants fused with mCitrine were estimated using the Protein Calculator v3.3 that is available on-line (<http://www.scripps.edu/cgi-bin/cdputnam/protcalc3>). The primary sequences given below were submitted and the charge at different pH was estimated by the program (Table S1).

mCitrine-*Scr*-HD<sub>wt</sub>  
MVSKEELFTGVVPIVELDGDVNGHKFSVSGEGEG-DATYGLKTLKFICTTGKLPVPWPTLVITFGYGLMCFARY-PDHMKQHDFFKSAMPEGYVQERTIFFKDDGNYKTRAE-VKFEGLTLVNRIELKGIDFKEDGNILGHKLEYNYNSHN-

VYIMADKQKNGIKVNFKIRHNIEDGVSQVLADHYQQNT-  
PIGDGPVLLPDNHLYSYQSALS KDPNEKRDMVLLFVTA-  
AAGITLGMDELYKLEPPQIYPWMKRVHLGTSTVNANGE-  
TKRQRTSYTRYQTLLEKEFHFNRYLTRRRRIEIAHALCL-  
LTEROIKIWFQNRMMKWKKEHKMASMNIVPYHMGYPG-  
HPYHQFDIHPSQFAHLSA

mCitrine-Scr-HD<sub>AA</sub>

MVSKGEELFTGVVPILVELDGDVNGHKFSVSGEGEG-  
DATYGKLTLLKFICTTGKLPVPWPTLVTTFGYGLMCFARY-  
PDHMKQHDFFKSAMPEGYVQERTIFFKDDGNYKTRAE-  
VKFEGDTLVNRIELKGIDFKEDGNILGHKLEYNYNHNV-  
YIMADKQKNGIKVNFKIRHNIEDGVSQVLADHYQQNTPI-  
GDGPVLLPDNHLYSYQSALS KDPNEKRDMVLLFVTA-  
AGITLGMDELYKLEPPQIYPWMKRVHLGTSTVNANGET-  
KRQRAAYTRYQTLLEKEFHFNRYLTRRRRIEIAHALCL-  
TEROIKIWFQNRMMKWKKEHKMASMNIVPYHMGYPG-  
HPYHQFDIHPSQFAHLSA

mCitrine-Scr-HD<sub>DD</sub>

MVSKGEELFTGVVPILVELDGDVNGHKFSVSGEGEG-  
DATYGKLTLLKFICTTGKLPVPWPTLVTTFGYGLMCFAR-  
YDPHMKQHDFFKSAMPEGYVQERTIFFKDDGNYKTRAE-  
VKFEGDTLVNRIELKGIDFKEDGNILGHKLEYNYNHNV-  
YIMADKQKNGIKVNFKIRHNIEDGVSQVLADHYQQNT-  
PIGDGPVLLPDNHLYSYQSALS KDPNEKRDMVLLFVTA-  
AAGITLGMDELYKLEPPQIYPWMKRVHLGTSTVNA-  
NGETKRQRDDYTRYQTLLEKEFHFNRYLTRRRRIEIA-  
HALCLTEROIKIWFQNRMMKWKKEHKMASMNIVPY-  
HMGYPGHPYHQFDIHPSQFAHLSA

mCitrine-Scr-HD<sub>DD</sub><sup>Q50AN51A</sup>

MVSKGEELFTGVVPILVELDGDVNGHKFSVSGEGEG-  
DATYGKLTLLKFICTTGKLPVPWPTLVTTFGYGLMCFAR-  
YDPHMKQHDFFKSAMPEGYVQERTIFFKDDGNYKTRAE-  
VKFEGDTLVNRIELKGIDFKEDGNILGHKLEYNYNHNV-  
YIMADKQKNGIKVNFKIRHNIEDGVSQVLADHYQQNT-  
PIGDGPVLLPDNHLYSYQSALS KDPNEKRDMVLLFVTA-  
AAGITLGMDELYKLEPPQIYPWMKRVHLGTSTVNA-  
NGETKRQRDDYTRYQTLLEKEFHFNRYLTRRRRIEIA-  
HALCLTEROIKIWFQNRMMKWKKEHKMASMNIVPYH-  
MGYPGHPYHQFDIHPSQFAHLSA

**Supplement 4: Materials and Methods. Immunohistochemistry.** Salivary glands from third instar wandering larvae were dissected at room temperature (RT) by pulling the mouth-hooks from the larval body in Grace's medium (Gibco) and the whole tissue was fixed for 10 min in Grace's medium containing 5.3% EM-grade paraformaldehyde (Electron Microscopy Science, PA) freshly used every 10 days. After twice washed for 15 min in PBT (PBS containing 0.1% TritonX-100) and blocked for at least 30 min in PBT containing 5% normal goat serum (NGS) and 20 µg/mL NaN<sub>3</sub>, samples were incubated with primary antibodies in blocking solution overnight. Subsequently, samples were washed 3 times for 20 min in PBT and secondary antibodies were applied in PBS for 4 h at RT. After 3 washes for 20 min with PBT and equilibration in PBS, the salivary glands were separated from the mouth-hooks and mounted in Vectashield (Vector Laboratories). Images were obtained within 24 h using a Leica SP5 Confocal setup.

**Purification of mCitrine-Scr-HD<sub>wt</sub>.** mCitrine-Scr-HD<sub>wt</sub> was cloned as an *EcoRI*-*NotI* fragment into the pET-21b(+) vector (Novagen), and the 6× histidine-tagged peptide produced in Rosetta™ 2 (DE3)pLysS cells (Novagen). Purification of a small amount of recombinant protein was performed using the ProBond™ Purification System (Invitrogen). Expression of the peptide was confirmed by SDS-PAGE and Western blotting using a mouse anti-GFP antibody (Molecular Probes). Protein was concentrated and used for FCS analysis in solution.

**Preparation of salivary glands for FCS and heat shock procedures.** For FCS measurements 3–4 pairs of salivary glands were dissected from third instar wandering larvae in Grace's medium and transferred to chambered slides (Nalge Nunc International) containing PBS. For titrating the concentration of Scr-HD in the nucleus, variable (from 10 min up to 2 h) heat-shocks were applied to the larvae prior to dissection. Then, larvae were dissected within short time and used in the measurements.

**APD imaging.** An individually modified instrument (Zeiss, LSM 510, ConfoCor 3) with fully integrated FCS/CLSM optical pathways was used for imaging. The detection efficiency of CLSM imaging was significantly improved by the introduction of APD detectors. As compared to PMTs, which are normally used as detectors in conventional CLSM, the APDs are characterized by higher quantum yield and collection efficiency—about 70% in APDs as compared to 15–25% in PMTs, higher gain, negligible dark current and better efficiency in the red part of the spectrum. Enhanced fluorescence detection efficiency enabled image collection using fast scanning (1–5 µs/pixel). This enhances further the signal-to-noise-ratio by avoiding fluorescence loss due to triplet state formation, enabling fluorescence imaging with single-molecule sensitivity. In addition, low laser intensities (150–750 µW) could be applied for imaging, significantly reducing the photo-toxicity. Advantages of APD imaging for nondestructive observation of molecular interactions in real time in live cells are described in detail in reference 23, listed in the main text.

**Short background on fluorescence correlation spectroscopy (FCS).**

FCS measurements are performed by recording fluorescence intensity fluctuations in a very small, approximately ellipsoidal volume element (about 400 nm wide and 1.5 µm long) that is generated in the salivary gland nuclei by focusing the laser light through the objective of the microscope. The fluorescence intensity fluctuations, caused by fluorescently labeled molecules passing through the volume element, are analyzed using statistical methods. Temporal autocorrelation analysis was used in this study, but other methods can be also applied. For recent reviews on FCS see references 27–29 in the main text.

In temporal autocorrelation analysis we first derive the autocorrelation function  $G(t)$ :

$$G(\tau) = 1 + \frac{\langle \delta I(t) \delta I(t + \tau) \rangle}{\langle I \rangle^2}, \tag{S36}$$

that gives the correlation between the intensity of light,  $I(t)$ , measured at a certain time,  $t$ , and its intensity,  $I(t + \tau)$ , measured at a later time  $t + \tau$ . For further analysis, an autocorrelation curve is derived by plotting  $G(\tau)$  as a function of different lags, i.e. different autocorrelation times  $\tau$ . See for example Figs 2–4 in the main text. The amplitude of the autocorrelation function is reciprocally proportional to the average number of molecules in the observation volume. Thus, the amplitude of the autocorrelation curve decreases for increasing number of molecules (Fig. 2D, Fig. 4A and B). The inflection points on the autocorrelation curves reflect the characteristic times for the investigated molecular processes.

The experimentally obtained autocorrelation curves are compared to autocorrelation functions derived for different model systems. A model describing free diffusion of two components and triplet formation was used in this study:

$$G(\tau) = 1 + \frac{1}{N} \cdot \left( \frac{1-y}{(1 + \frac{\tau}{\tau_{D1}}) \sqrt{1 + \frac{w_{xy}^2}{w_x^2} \frac{\tau}{\tau_{D1}}}} + \frac{y}{(1 + \frac{\tau}{\tau_{D2}}) \sqrt{1 + \frac{w_{xy}^2}{w_y^2} \frac{\tau}{\tau_{D2}}}} \right) \cdot \left[ 1 + \frac{T}{1-T} \exp\left(-\frac{\tau}{\tau_T}\right) \right] \tag{S37}$$
